# Supplementary material for: Resistance to anti-PD-1/anti-PD-L1: galectin-3 inhibition with GB1211 reverses galectin-3-induced blockade of pembrolizumab and atezolizumab binding to PD-1/PD-L1
Source: PubMed Central journal article supplement (PMC10493609; doi:10.3389/fimmu.2023.1250559), 2023-08-28
Supplement: DataSheet_1.pdf [file DataSheet_1.pdf]

## **SUPPLEMENTARY**

### **SUPPLEMENTARY METHODS**

#### *Surface plasmon resonance (SPR) methods*

For measurement of GB1211 binding to Gal-3, a CM5 sensorchip was used to amine couple and immobilise Gal-3. EDC and NHS were mixed at a 50:50 ratio and associated over the flow cells for 240 s at a flow rate of 10  $\mu\text{L}/\text{min}$  to activate the surface. Ligand was then flown over the chip at 10  $\mu\text{g}/\text{mL}$  using the 'aim for' function to capture 650 RU of ligand. Flow cells were then deactivated with a 240 s association with 1M ethanolamine-HCL. Flow cell 1 was used as a reference with no ligand captured, the chip was then left for 12 h to equilibrate. To determine the kinetics of GB1211 binding the immobilised Gal-3, a titration of GB1211 added in running buffer (PBS P+, 0.2 M phosphate, 27 mM KCl, 1.5 M NaCl, 0.5% Tween20, 5% DMSO, 1 mM DTT at a pH 7). A multi-cycle approach was used, where after a baseline, compound was associated for 60 s at 30  $\mu\text{L}/\text{min}$  followed by a 60 s dissociation at 30  $\mu\text{L}/\text{min}$ . A regeneration was performed between each cycle involving a 200 s wash with running buffer to allow the analyte to fully dissociate.

For the measurement of Gal-3 potentiation of binding between PD-1 and PD-L1, a CM5 sensorchip was used to amine couple and immobilise PD-1. EDC and NHS were mixed at a 50:50 ratio and associated over the flow cells for 240 s at a flow rate of 10  $\mu\text{L}/\text{min}$  to activate the surface. Ligand was then flown over the chip at 10  $\mu\text{g}/\text{mL}$  using a 120 s association to capture approximately 70 RU of PD-1 on flow cells 1. Flow cells were then deactivated with a 240 s association with 1 M ethanolamine-HCL. A fixed concentration of 4  $\mu\text{M}$  Gal-3 was used for all conditions with a titration of PD-L1 added. A baseline of 40 s was used with running buffer prior to a 120 s association with PD-L1 or PD-L1 + Gal-3 at 30  $\mu\text{L}/\text{mL}$ . This was followed by a 60 s dissociation with running buffer. The response was plotted where full binding represented Gal-3 binding to immobilised ligand.

For measurement of Gal-3 binding to PD-1, PD-L1 and the PD-1/PD-L1 complex, a CM5 sensorchip was used to amine couple and immobilise PD-1 or PD-L1. EDC and NHS were mixed at a 50:50 ratio and associated over the flow cells for 240 s at a flow rate of 10  $\mu\text{L}/\text{min}$  to activate the surface. Ligand was then flown over the chip at 10  $\mu\text{g}/\text{mL}$  using a 120 s association to capture approximately 1000 RU of PD-1 or PD-L1 on flow cells 1 and 2, respectively. Flow cells were then deactivated with a 240 s

association with 1 M ethanolamine-HCL. A fixed concentration of 1  $\mu$ M Gal-3 was used for all conditions with a titration of GB1211 tested in running buffer. A multi-cycle approach was used where each cycle was followed by a regeneration in running buffer. After a 40 s baseline in running buffer, the mixture of Gal-3 and titrated compound was associated for 20 s, followed by a 30 s dissociation. The response was plotted where full binding represented Gal-3 binding immobilised ligand. The data was normalised using the Biacore™ Insight Evaluation Software's EC50 function.

For measurement of the interaction between Gal-3, PD-1, PD-L1 and atezolizumab, a sensorchip was used to amine couple and immobilise PD-1. EDC and NHS were mixed at a 50:50 ratio and associated over the flow cells for 240 s at a flow rate of 10  $\mu$ L/mL to activate the surface. Ligand was then flown over the chip at 10  $\mu$ g/mL using a 120 s association to capture approximately 70 RU of PD-1 on flow cells 1 to 8 respectively. Flow cells were then deactivated with a 240 s association with 1 M ethanolamine-HCL. A multi-cycle approach using the A-B-A inject function was adopted to determine the effect of atezolizumab on preventing PD-L1 from binding the immobilised PD-1. The 'A' inject comprised of all components in the complex minus the addition of PD-L1. Gal-3 and GB1211 were added at a constant 4  $\mu$ M. Inject 'B' comprised of the same analytes used in injection 'A' but with the addition of PD-L1 at 2  $\mu$ M. Injection 'A' was performed for 30 s at 30  $\mu$ L/mL followed by injection 'B' for 50 s at 30  $\mu$ L/min. This was then followed by a further 'A' Inject for 50 seconds at 30  $\mu$ L/min. Double reference subtraction was used against a blank for injection 'A' only. A regeneration step was completed after each cycle with addition of glycine pH 2.5 for 30 s. Report points from the sensorgram's saturated binding was used to determine a minimum and maximum pembrolizumab binding for normalisation of binding.

For measurement of the interaction between Gal-3, PD-1, PD-L1 and pembrolizumab, a CM5 sensorchip was used to amine couple and immobilise PD-1. EDC and NHS were mixed at a 50:50 ratio and associated over the flow cells for 240 s at a flow rate of 10  $\mu$ L/min to activate the surface. Ligand was then flown over the chip at 10  $\mu$ g/mL using a 120 s association to capture approximately 70 RU of PD-1 on flow cells 1 to 8 respectively. Flow cells were then deactivated with a 240 s association with 1 M ethanolamine-HCL. A multicycle A-B-A inject approach was used with injection 'A' comprised of either running buffer alone, PD-L1, Gal-3, PD-L1 and Gal-3, PD-L1, Gal-3 and GB1211 or Gal-3

and GB1211. Gal-3 and GB1211 added at a constant 4  $\mu\text{M}$  and PD-L1 added at a constant 1  $\mu\text{M}$ . Injection 'B' contained the same analyte as injection 'A' but with a titration of pembrolizumab added. A regeneration step was completed after each cycle with addition of glycine pH 2.5 for 30 s.

### SUPPLEMENTARY RESULTS

**Table 1.** The reversal of Gal-3 blockade of atezolizumab binding to Raji-APC-hPD-L1 cells and pembrolizumab binding to Jurkat Lucia<sup>TM</sup> TCR-hPD-1 cells by GB1211.

| Condition                      | Atezolizumab EC50 (nM)  | Fold shift vs. control |
|--------------------------------|-------------------------|------------------------|
| Atezolizumab (Control)         | 2.7 $\pm$ 0.2           | -                      |
| Atezolizumab + Gal-3           | 10.1 $\pm$ 3.5          | 3.7                    |
| Atezolizumab + Gal-3 + GB1211  | 3.3 $\pm$ 3.1           | 1.2                    |
|                                |                         |                        |
| Condition                      | Pembrolizumab EC50 (nM) | Fold shift vs. control |
| Pembrolizumab (Control)        | 1.6 $\pm$ 0.4           | -                      |
| Pembrolizumab + Gal-3          | 5.1 $\pm$ 0.6           | 3.2                    |
| Pembrolizumab + Gal-3 + GB1211 | 2.4 $\pm$ 0.4           | 1.5                    |

Data shown is mean  $\pm$  SEM from 3 experimental replicates.

Supplementary Figure 1.

**A**

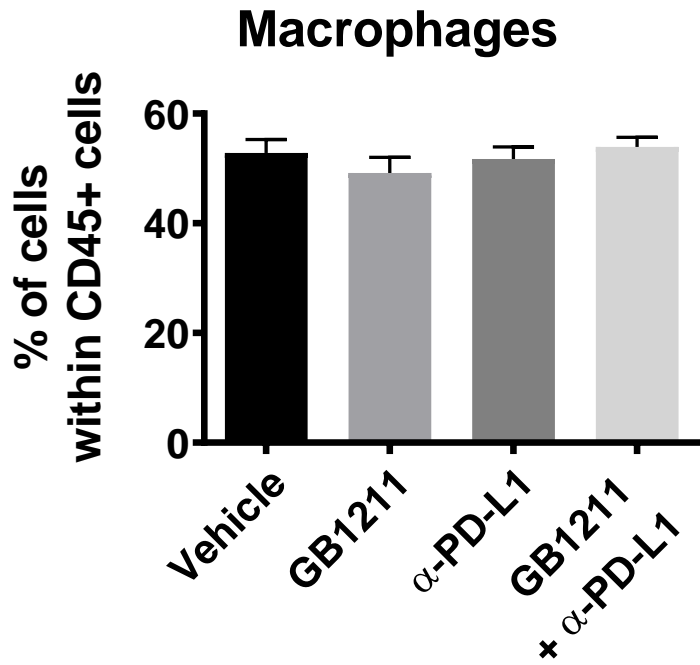

**B**

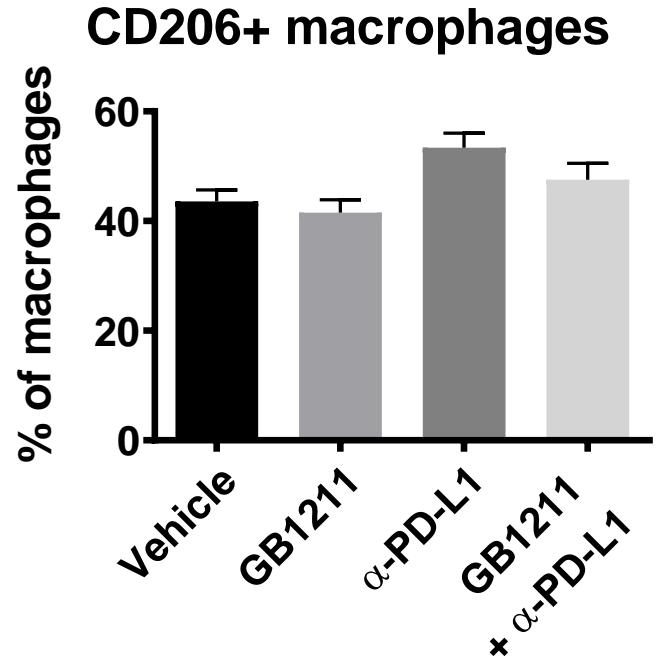

**C**

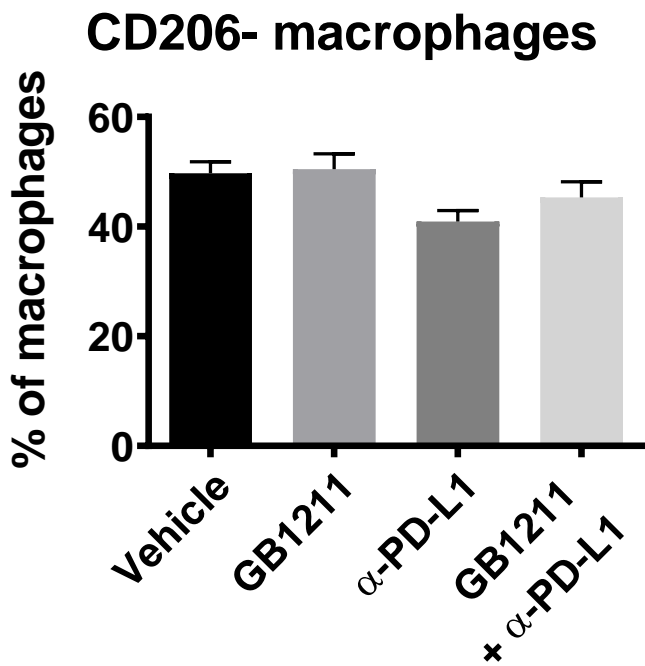

**D**

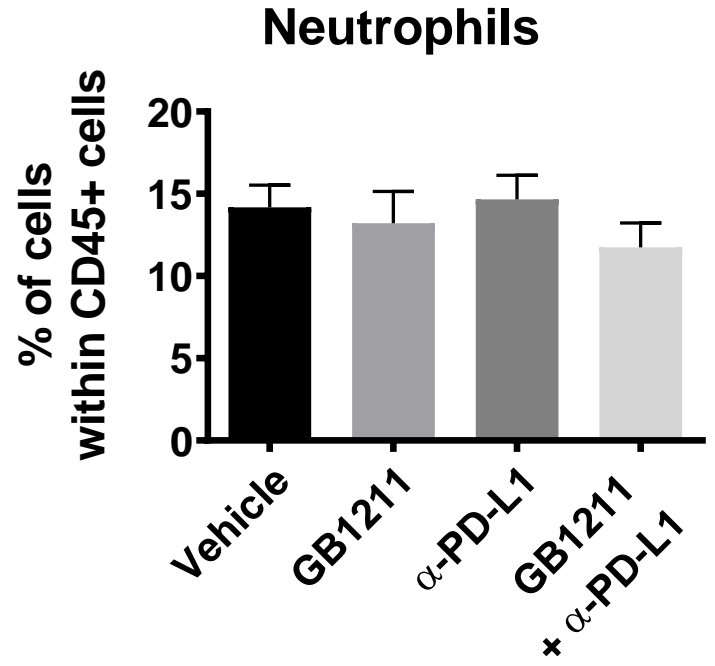

**Supplementary Figure 1.** LLC1 subcutaneous tumor digests were analysed for (A) total macrophage (B) CD206+ macrophage, (C) CD206- macrophage and (D) neutrophil populations by flow cytometry. Frequency of cells expressed as a % of the total immune (CD45+) population. Results are expressed as mean  $\pm$  SEM (vehicle n=12, GB1211 n=10, anti-PD-L1 n=10, GB1211+anti-PD-L1 n=12). Analysed via one-way ANOVA with Dunnett's post-test with only significant changes highlighted.
